# Supplementary material for: Misidentified biomedical resources: Journal guidelines are not a quick fix
Source: PubMed Central journal article supplement — Int J Cancer. 2021 Dec 7;150(8):1233–43. doi: 10.1002/ijc.33882 (PMC9300184; doi:10.1002/ijc.33882), 2021-12-07
Supplement: IJC-150-1233-s001.pdf [file IJC-150-1233-s001.pdf]

# Supplementary material of *Misidentified biomedical resources: Journal guidelines are not a quick fix*

Wytske M. Hepkema, Serge P.J.M. Horbach, Joyce M. Hoek, Willem Halffman

## Table of Contents

|                                                                                                                                                                                            |    |
|--------------------------------------------------------------------------------------------------------------------------------------------------------------------------------------------|----|
| Supplementary Materials & Methods.....                                                                                                                                                     | 2  |
| 1. Journal guidelines.....                                                                                                                                                                 | 2  |
| 1a Nature Portfolio guidelines regarding cell line authentication .....                                                                                                                    | 2  |
| 1b Biomed Central guidelines regarding cell line authentication.....                                                                                                                       | 2  |
| 1c Nature Portfolio guidelines regarding antibodies .....                                                                                                                                  | 2  |
| 1d BioMed Central guidelines regarding antibodies .....                                                                                                                                    | 2  |
| 1e Nature Portfolio guidelines regarding the ARRIVE guidelines .....                                                                                                                       | 3  |
| 1f BioMed Central guidelines regarding the ARRIVE guidelines .....                                                                                                                         | 3  |
| 2. Detailed description of data obtained through the search method described by Horbach and Halffman <sup>1</sup> .....                                                                    | 3  |
| 2a Journal selection .....                                                                                                                                                                 | 3  |
| 2b Comparison .....                                                                                                                                                                        | 4  |
| 2c More detailed analysis of <i>International Journal of Cancer</i> and <i>Blood</i> .....                                                                                                 | 4  |
| 3. Detailed description of reanalysis of dataset of Babic, Capes-Davis, Martone, Bairoch, Ozyurt, Gillespie and Bandrowski <sup>4</sup> .....                                              | 5  |
| 4. Detailed description of reanalysis of the datasets of Menke, Roelandse, Ozyurt, Martone and Bandrowski <sup>5</sup> .....                                                               | 5  |
| Supplementary Tables .....                                                                                                                                                                 | 7  |
| Supplementary table 1 Cell lines: Identifiability & Authentication as obtained through reanalysis of the dataset of Menke, Roelandse, Ozyurt, Martone and Bandrowski <sup>5</sup> .....    | 7  |
| Supplementary table 2 Cell lines: misidentified as identified by search method of Horbach and Halffman <sup>1</sup> .....                                                                  | 8  |
| Supplementary table 3 Cell lines: misidentified as obtained through reanalysis of the dataset of Babic, Capes-Davis, Martone, Bairoch, Ozyurt, Gillespie and Bandrowski <sup>3</sup> ..... | 9  |
| Supplementary table 4 Cell lines: misidentified cell lines in <i>International Journal of cancer</i> and <i>Blood</i> .....                                                                | 10 |
| Supplementary table 5 Antibodies: identifiability as obtained through reanalysis of the dataset of Menke, Roelandse, Ozyurt, Martone and Bandrowski <sup>5</sup> .....                     | 12 |
| Supplementary table 6 Organisms: identifiability as obtained through reanalysis of the dataset of Menke, Roelandse, Ozyurt, Martone and Bandrowski <sup>5</sup> .....                      | 13 |
| Supplementary references .....                                                                                                                                                             | 14 |

## Supplementary Materials & Methods

### 1. Journal guidelines

#### 1a Nature Portfolio guidelines regarding cell line authentication

“Cell lines: We strongly encourage deposition of new cell lines in repositories that will distribute them with certificates of authentication. Alternatively, we recommend that authors establish a profile of their new cell lines to allow future authentication. The distribution of human cell lines used in research should not be hindered by restrictions from donors. Researchers developing cell lines must investigate and disclose any restrictions associated with the tissue they are using (see this Nature Editorial for further explanation.) Cell line misidentification and cross-contamination is a common problem with serious consequences. Authors are asked to report on the source and authentication of their cell lines (relevant resources are listed under Further Reading)”

(As downloaded from <https://www.nature.com/nature-portfolio/editorial-policies/reporting-standards#furthercell> on 13-04-2021.)

#### 1b Biomed Central guidelines regarding cell line authentication

##### “Cell line authentication

If human cell lines are used, authors are strongly encouraged to include the following information in their manuscript:

- The source of the cell line, including when and from where it was obtained
- Whether the cell line has recently been authenticated and by what method
- Whether the cell line has recently been tested for mycoplasma contamination

Further information is available from the International Cell Line Authentication Committee (ICLAC). We recommend that authors check the NCBI database for misidentification and contamination of human cell lines.”

(As downloaded from <https://www.biomedcentral.com/getpublished/editorial-policies#StandardsofReporting> on 13-04-2021.)

#### 1c Nature Portfolio guidelines regarding antibodies

“Nature Portfolio supports the Resource Identification Initiative, with the aim of promoting unique, persistent identification and tracking of key biological resources, including antibodies, cell lines, model organisms and tools. We encourage authors to include unique identifiers provided by the Resource Identification Portal, (RRIDs; for example, Antibody: RRID:AB\_2140114; Organism: RRID:MGI\_MGI:3840442), in the manuscript. More information on how to include listed RRIDs or generate new RRIDs can be found on the Resource Identification Portal.”

(As downloaded from <https://www.nature.com/nature-portfolio/editorial-policies/reporting-standards#furthercell> on 13-04-2021.)

#### 1d BioMed Central guidelines regarding antibodies

##### “Resource identification

To enable effective tracking of the key resources used to produce the scientific findings reported in the biomedical literature, authors are expected to include a full description of all resources with enough information to allow them to be uniquely identified. In support of the Resource Identification Initiative (RII), we encourage authors to use unique Resource Identifiers (RRIDs) within their manuscript to identify their model organisms, antibodies, or tools.”

(As downloaded from <https://www.biomedcentral.com/getpublished/editorial-policies#StandardsofReporting> on 13-04-2021.)

### 1e Nature Portfolio guidelines regarding the ARRIVE guidelines

“For primary research manuscripts in the Nature Portfolio journals (Articles, Letters, Brief Communications, Technical Reports) reporting experiments on live vertebrates and/or higher invertebrates, the corresponding author must confirm that all experiments were performed in accordance with relevant guidelines and regulations. The manuscript must include a statement identifying the institutional and/or licensing committee approving the experiments, including any relevant details. Sex and other characteristics of animals that may influence results must be described. Details of housing and husbandry must be included where they are likely to influence experimental results. We recommend following the ARRIVE reporting guidelines when documenting animal studies (PLoS Bio 8(6), e1000412,2010). We also recommend consulting the American Veterinary Medical Association (AVMA) Guidelines for the Euthanasia of Animals (2020), as a comprehensive resource for guidance on veterinary best practice for the anesthesia and euthanasia of animal.”

(As downloaded from <https://www.nature.com/nature-portfolio/editorial-policies/ethics-and-biosecurity> on 13-04-2021.)

### 1f BioMed Central guidelines regarding the ARRIVE guidelines

“BMC advocates complete and transparent reporting of biomedical and biological research. Please refer to the Minimum standards of reporting checklist when reporting your research (published in BMC Biology). Exact requirements may vary depending on the journal; please refer to the journal’s submission guidelines. We also strongly recommend that authors refer to the minimum reporting guidelines for health research hosted by the EQUATOR Network when preparing their manuscript, and FAIRsharing.org for reporting checklists for biological and biomedical research, where applicable. Authors should adhere to these guidelines when drafting their manuscript, and peer reviewers will be asked to refer to these checklists when evaluating such studies.

Checklists are available for a number of study designs, including:

- Randomized controlled trials (CONSORT) and protocols (SPIRIT)
- Systematic reviews and meta-analyses\* (PRISMA) and protocols (PRISMA-P)
- Observational studies (STROBE)
- Case reports (CARE)
- Qualitative research (COREQ)
- Diagnostic/prognostic studies (STARD and TRIPOD)
- Economic evaluations (CHEERS)
- Pre-clinical animal studies (ARRIVE)”

(As downloaded from <https://www.biomedcentral.com/getpublished/editorial-policies#StandardsofReporting> on 13-04-2021.)

## 2. Detailed description of data obtained through the search method described by Horbach and Halfman <sup>1</sup>

### 2a Journal selection

In order to assess the effect of journal guidelines regarding cell line authentication and to control for the effect of changes over time, such as a growing awareness of misidentification problems in research communities, we selected for journals with guidelines implemented in the same year. Which resulted in the journals of *BioMed Central (BMC)* and *Nature Portfolio*. *BMC* implemented their guidelines in 2015 and *Nature Portfolio* in 2013, which became stringent in 2015. We did not include all *BMC* and *Nature Research* journals in our analysis. Since we used Web of Science (WoS) for our analysis, this excluded journals not in WoS. To exclude journals not working on cell lines and avoid contamination of the data set, we further refined this list by selecting for relevant research areas, as did Horbach and Halfman <sup>1</sup>. Some journals were discontinued before the implementation of the guidelines in 2015, or were established afterwards. Since it is not possible to see an effect of the guidelines in these journals, we only included journals that published articles in all years between 2014 and 2018.

Since the number of articles on misidentified cell lines can differ per research field, we selected comparable journals as a control based on their citing behaviour. We decided that to select journals working within the same research field, citing behaviour would be the best criteria. Therefore, we did not take other factors, such as prestige, into account when selecting comparable journals. To select comparable journals, we created bibliographic coupling networks based on citing publications in the period 1995 – 2018. To account for differences in the number of authors per paper, we used bibliographic coupling based on fractional counting, for details see Perianes-Rodriguez, Waltman and Van Eck <sup>2</sup>.

Bibliographic coupling produces comparable journals for every journal in our set, but since some journals occur more than once in this set, and we wanted a control group of the same size, this required an additional procedure. As a first step, we used the bibliographic coupling to select the 30 most comparable journals for each of the journals of *BMC* and *Nature Portfolio* that we included in our analysis. We then had to select a comparable journal without guidelines for each of these journals from the top 30 without creating doubles. For the first journal on this list (alphabetically sorted on journals with guidelines), we selected the first comparable journal without guidelines regarding cell line authentication. In order to do so, we checked the author guidelines manually and excluded journals with guidelines regarding cell line authentication. In addition, journals with guidelines for RRIDs mentioning cell lines were also excluded. For the second journal and onwards, we selected the first comparable journal without guidelines not already present in our control group. For three journals, we did not find a suitable control in the top 30. Therefore, we excluded these three journals from our analysis.

## 2b Comparison

We applied the search string as described by Horbach and Halfman <sup>1</sup> in WoS to each journal of our analysis, and listed the number of articles using misidentified cell lines for the years 1995 – 2018 for these journals. Since the yearly number of articles can vary greatly between journals, and the number of articles on cells can vary between journals, we also noted the number of articles with the topic *cell*. We then calculated the number of articles using misidentified cell lines as a percentage of the articles on cells.

Not all journals published articles in all years between 1995 and 2018. To ensure that the data of our control groups best matches the data of the journals with guidelines, we only included the data of the years both the journal with guidelines and the control journal existed. For example, *BMC Cancer* was established in 2001. The control journal of *BMC Cancer* is *Journal of Clinical Oncology*, which was established before 1995. Since we are compared *BMC Cancer* to *Journal of Clinical Oncology*, we only included the data of *Journal of Clinical Oncology* from 2001 onwards.

## 2c More detailed analysis of *International Journal of Cancer* and *Blood*

We performed a more detailed study for two journals. We chose the *International Journal of Cancer (IJC)* since this journal previously evaluated its guidelines as effective <sup>3</sup>. For the control, we again looked at the top 30 most comparable journals based on citing behaviour (see supplementary material 2a). Of the most comparable journals without guidelines, we picked the first journal with a comparable number of articles using misidentified cell lines, i.e. *Blood*.

For all articles in the *IJC* and *Blood* that used misidentified cell lines as identified with the search string described by Horbach and Halfman <sup>1</sup>, we assessed the use of the misidentified cell lines in these papers. We distinguished two categories of false positives: *papers warning about misidentified cell lines* and *papers in which no misidentified cell line was used*. For the articles that did use a misidentified cell line, we distinguished three categories, *misidentified cell line used but aware of problem (1)*, *misidentified cell line used but of same tissue type (2)*, and *misidentified cell line used and unaware of problem (3)*. For the last two categories we also distinguished between misidentified

cell lines that were used before or after they were first reported to be misidentified. We used the column “misidentification first reported by” of ICLAC’s register for this purpose. When there were multiple years in this column we used the first one, when the article was published in the same year as the first reported we counted it as “before”, and if there was no year in this column we also counted it as “before” (for exact numbers see supplementary table 4).

The search string described by Horbach and Halffman <sup>1</sup>, searches both for the names of misidentified cell lines and for articles that cite the establishing paper of a misidentified cell line. For the articles identified based on the name of the misidentified cell line, we first read the abstract, and in case of doubt the rest of the paper. For the articles found based on the establishing paper, we first checked which establishing paper was cited. Then we checked if the cell line established in that paper was used by reading the material and methods section, in case of doubt the full body of text was searched for this cell line. In addition, if multiple cell lines were used, we also checked those.

Some articles did not state the tissue type of the cell line, or did not mention the specifics of the tissue type, these were counted as *misidentified cell line used, and unaware of problem*. There were also some articles which did not use the misidentified cell line of the cited establishing paper, but did use another misidentified cell line (3 articles in *IJC* and 11 in *Blood*). Since these articles did use a misidentified cell line, they were also counted as *misidentified cell line used, and unaware of problem* or *misidentified cell line used, but of same tissue type*, depending on the cell line. For *Blood*, 48 of the articles were meeting abstracts of which the full texts were unavailable. For one of these, it was clear that the misidentified cell line was mentioned as a warning about misidentified cell lines; the other 47 articles were excluded from our analysis.

### 3. Detailed description of reanalysis of dataset of Babic, Capes-Davis, Martone, Bairoch, Ozyurt, Gillespie and Bandrowski <sup>4</sup>

Babic, Capes-Davis, Martone, Bairoch, Ozyurt, Gillespie and Bandrowski <sup>4</sup> identified 150.459 articles using cell lines by text-mining the methods section of about two million papers in PubMed central. In short, they used the SciScore tool *Named Entity Recognition-based algorithm* to identify cell-line names in the methods sections. Then, these cell-line names were coupled to ICLAC’s list of misidentified cell lines including the partially misidentified cell lines, and all synonyms present in Cellosaurus. They coupled the identified cell-line names to this list in two approaches; *strict* and *loose*. To avoid false positives, we continued only with the strict approach. In addition, we excluded the partially misidentified cell lines, and continued only with the misidentified cell lines of ICLAC’s list.

So far as possible, we included the same journals as our analysis of articles found with the search string of Horbach and Halffman <sup>1</sup>. However, since this dataset is limited to articles accessible for text-mining, not all journals we previously included were present in this dataset. Then, to assess the effect of guidelines using SciScore text-mining, we first selected all unique PMIDs of articles using cell lines. We then searched these PMIDs in WoS and noted the number of articles for each year in the period 1995-2018 for the journals of *BMC*, *Nature Portfolio*, and journals without guidelines regarding cell line authentication. Subsequently, we searched the PMIDs of articles that used misidentified cell lines in WoS and again noted the number of articles for each year in the period 1995-2018 for the journals of *BMC*, *Nature Portfolio*, and journals without guidelines. Finally, we calculated the number of articles using misidentified cell lines as a percentage of the articles on cells. In our graph we only included the years in which each group had hundred or more articles using a cell line to prevent a skewed image caused by little data.

### 4. Detailed description of reanalysis of the datasets of Menke, Roelandse, Ozyurt, Martone and Bandrowski <sup>5</sup>

We downloaded supplementary data 8 (cell lines), supplementary data 7 (antibodies), and supplementary data 1 of Menke, Roelandse, Ozyurt, Martone and Bandrowski <sup>5</sup>. For each of these files

we first copied the column containing the journal names and removed the duplicates. For these three lists of journals, we manually divided all journals in four categories; journals of (1) *BMC*, (2) *Nature Portfolio*, (3) other journals with guidelines (regarding cell line authentication, antibodies, or organisms depending on the file), and (4) journals without guidelines. For cell line authentication, journals with guidelines for RRIDs mentioning cell lines and no separate mention of cell line authentication were counted as journals without guidelines regarding cell line authentication. For antibodies, we did include journals that ask for RRIDs for antibodies. For organism, journals were counted as 'with guidelines' if the ARRIVE-guidelines were mentioned. With these four groups of journals, we labelled each data-entry for these four groups. Then, we sorted the data entries per journal group and year, and calculated the yearly average of percentage of cell lines/ antibodies/ organism that were identifiable/ authenticated. In our graph we only included the years in which each group had ten or more different journals to prevent presenting a skewed image caused by little data.

## Supplementary Tables

Supplementary table 1 Cell lines: Identifiability & Authentication as obtained through reanalysis of the dataset of Menke, Roelandse, Ozyurt, Martone and Bandrowski <sup>5</sup>

| Year | BMC                               |                                   |                                  |               |                 | Nature                            |                                   |                                  |               |                 | Other Journals without guidelines |                                   |                                  |               |                 | Journals without guidelines       |                                   |                                  |               |                 |
|------|-----------------------------------|-----------------------------------|----------------------------------|---------------|-----------------|-----------------------------------|-----------------------------------|----------------------------------|---------------|-----------------|-----------------------------------|-----------------------------------|----------------------------------|---------------|-----------------|-----------------------------------|-----------------------------------|----------------------------------|---------------|-----------------|
|      | total number of journals analyzed | total number of articles analyzed | total number of cell lines found | %identifiable | % authenticated | total number of journals analyzed | total number of articles analyzed | total number of cell lines found | %identifiable | % authenticated | total number of journals analyzed | total number of articles analyzed | total number of cell lines found | %identifiable | % authenticated | total number of journals analyzed | total number of articles analyzed | total number of cell lines found | %identifiable | % authenticated |
| 1996 | 0                                 | 0                                 | 0                                | 0             | 0               | 0                                 | 0                                 | 0                                | 0             | 0               | 1                                 | 13                                | 22                               | 40.91%        | 7.69%           | 0                                 | 0                                 | 0                                | 0             | 0               |
| 1997 | 0                                 | 0                                 | 0                                | 0             | 0               | 0                                 | 0                                 | 0                                | 0             | 0               | 3                                 | 462                               | 862                              | 37.73%        | 4.12%           | 0                                 | 0                                 | 0                                | 0             | 0               |
| 1998 | 0                                 | 0                                 | 0                                | 0             | 0               | 0                                 | 0                                 | 0                                | 0             | 0               | 3                                 | 484                               | 917                              | 37.05%        | 4.48%           | 0                                 | 0                                 | 0                                | 0             | 0               |
| 1999 | 0                                 | 0                                 | 0                                | 0             | 0               | 0                                 | 0                                 | 0                                | 0             | 0               | 3                                 | 408                               | 768                              | 39.45%        | 5.57%           | 0                                 | 0                                 | 0                                | 0             | 0               |
| 2000 | 0                                 | 0                                 | 0                                | 0             | 0               | 0                                 | 0                                 | 0                                | 0             | 0               | 3                                 | 405                               | 807                              | 33.91%        | 2.94%           | 0                                 | 0                                 | 0                                | 0             | 0               |
| 2001 | 0                                 | 0                                 | 0                                | 0             | 0               | 0                                 | 0                                 | 0                                | 0             | 0               | 2                                 | 337                               | 693                              | 32.89%        | 4.67%           | 0                                 | 0                                 | 0                                | 0             | 0               |
| 2002 | 4                                 | 53                                | 85                               | 32%           | 3%              | 1                                 | 144                               | 287                              | 45.99%        | 2.67%           | 3                                 | 327                               | 646                              | 41.25%        | 5.58%           | 1                                 | 22                                | 32                               | 56.25%        | 0.00%           |
| 2003 | 0                                 | 0                                 | 0                                | 0             | 0               | 1                                 | 173                               | 382                              | 36.39%        | 3.23%           | 3                                 | 362                               | 669                              | 37.70%        | 2.48%           | 1                                 | 15                                | 24                               | 54.17%        | 6.67%           |
| 2004 | 9                                 | 145                               | 305                              | 37%           | 3%              | 1                                 | 156                               | 326                              | 41.41%        | 6.25%           | 4                                 | 368                               | 676                              | 37.75%        | 2.30%           | 2                                 | 48                                | 63                               | 39.17%        | 4.55%           |
| 2005 | 10                                | 257                               | 596                              | 43%           | 3%              | 1                                 | 124                               | 299                              | 37.79%        | 7.74%           | 5                                 | 377                               | 741                              | 37.30%        | 6.16%           | 3                                 | 264                               | 520                              | 52.05%        | 2.95%           |
| 2006 | 16                                | 426                               | 944                              | 46%           | 5%              | 1                                 | 106                               | 256                              | 45.70%        | 0.00%           | 8                                 | 433                               | 871                              | 44.46%        | 7.01%           | 3                                 | 237                               | 454                              | 49.93%        | 11.24%          |
| 2007 | 15                                | 491                               | 1011                             | 43%           | 4%              | 1                                 | 126                               | 303                              | 37.29%        | 0.00%           | 10                                | 712                               | 1399                             | 39.17%        | 5.06%           | 6                                 | 333                               | 632                              | 45.03%        | 4.27%           |
| 2008 | 19                                | 644                               | 1407                             | 43%           | 5%              | 1                                 | 136                               | 332                              | 36.45%        | 0.00%           | 12                                | 1213                              | 2397                             | 41.68%        | 4.81%           | 10                                | 473                               | 986                              | 38.75%        | 2.21%           |
| 2009 | 30                                | 973                               | 2072                             | 44%           | 5%              | 8                                 | 373                               | 846                              | 36.96%        | 2.31%           | 13                                | 1806                              | 3598                             | 39.94%        | 5.80%           | 20                                | 740                               | 1429                             | 35.90%        | 2.24%           |
| 2010 | 34                                | 1374                              | 3062                             | 44%           | 5%              | 13                                | 492                               | 1211                             | 39.95%        | 2.92%           | 14                                | 2444                              | 5123                             | 41.46%        | 5.25%           | 26                                | 1130                              | 2332                             | 38.59%        | 3.85%           |
| 2011 | 40                                | 1433                              | 3000                             | 44%           | 5%              | 18                                | 602                               | 1351                             | 36.91%        | 3.93%           | 20                                | 4137                              | 8600                             | 42.80%        | 5.66%           | 30                                | 1444                              | 2805                             | 37.72%        | 5.47%           |
| 2012 | 41                                | 1265                              | 2569                             | 44%           | 6%              | 21                                | 890                               | 1973                             | 40.86%        | 5.02%           | 27                                | 6367                              | 13363                            | 42.51%        | 5.26%           | 52                                | 2181                              | 4270                             | 38.06%        | 3.61%           |
| 2013 | 46                                | 1467                              | 3126                             | 45%           | 7%              | 22                                | 1534                              | 3539                             | 37.44%        | 6.36%           | 31                                | 8204                              | 17323                            | 42.59%        | 5.82%           | 72                                | 2871                              | 18950                            | 39.38%        | 5.30%           |
| 2014 | 49                                | 1910                              | 4192                             | 43%           | 7%              | 22                                | 1922                              | 4607                             | 39.17%        | 10.81%          | 40                                | 8316                              | 17720                            | 41.10%        | 7.63%           | 112                               | 4308                              | 8453                             | 35.97%        | 4.65%           |
| 2015 | 52                                | 1958                              | 4178                             | 42%           | 5%              | 25                                | 3472                              | 7957                             | 38.71%        | 18.11%          | 42                                | 8914                              | 20516                            | 40.08%        | 8.90%           | 119                               | 4551                              | 8785                             | 38.85%        | 6.35%           |
| 2016 | 47                                | 1645                              | 3419                             | 41%           | 8%              | 25                                | 5750                              | 12799                            | 39.69%        | 26.31%          | 43                                | 9663                              | 23080                            | 39.80%        | 8.21%           | 126                               | 5354                              | 10239                            | 39.63%        | 6.82%           |
| 2017 | 46                                | 1627                              | 3510                             | 41%           | 8%              | 31                                | 7081                              | 16074                            | 37.85%        | 27.58%          | 50                                | 10573                             | 24419                            | 41.59%        | 12.44%          | 143                               | 7104                              | 13902                            | 38.40%        | 8.27%           |
| 2018 | 49                                | 2048                              | 4689                             | 41%           | 10%             | 30                                | 5826                              | 14052                            | 37.01%        | 27.77%          | 62                                | 8528                              | 18602                            | 40.98%        | 14.18%          | 158                               | 9396                              | 19039                            | 38.53%        | 9.42%           |
| 2019 | 45                                | 1701                              | 4244                             | 43%           | 11%             | 13                                | 3453                              | 8103                             | 37.87%        | 28.92%          | 56                                | 5527                              | 11727                            | 38.92%        | 12.58%          | 123                               | 6879                              | 14899                            | 37.81%        | 11.60%          |

Supplementary table 2 Cell lines: misidentified as identified by search method of Horbach and Halfman <sup>1</sup>

| Year | BMC                                                                    |                                                 |                                                                    | Nature                                                                 |                                                 |                                                                    | Journals without guidelines                                            |                                                 |                                                                    |
|------|------------------------------------------------------------------------|-------------------------------------------------|--------------------------------------------------------------------|------------------------------------------------------------------------|-------------------------------------------------|--------------------------------------------------------------------|------------------------------------------------------------------------|-------------------------------------------------|--------------------------------------------------------------------|
|      | Total number of <b>journals</b> analyzed with articles with topic cell | Total number of <b>articles</b> with topic cell | Total number of articles that use a <b>misidentified</b> cell line | Total number of <b>journals</b> analyzed with articles with topic cell | Total number of <b>articles</b> with topic cell | Total number of articles that use a <b>misidentified</b> cell line | Total number of <b>journals</b> analyzed with articles with topic cell | Total number of <b>articles</b> with topic cell | Total number of articles that use a <b>misidentified</b> cell line |
| 1995 | 7                                                                      | 183                                             | 8                                                                  | 16                                                                     | 2309                                            | 50                                                                 | 20                                                                     | 5648                                            | 61                                                                 |
| 1996 | 7                                                                      | 126                                             | 1                                                                  | 19                                                                     | 2901                                            | 50                                                                 | 23                                                                     | 6759                                            | 71                                                                 |
| 1997 | 8                                                                      | 160                                             | 3                                                                  | 22                                                                     | 3551                                            | 56                                                                 | 27                                                                     | 8818                                            | 89                                                                 |
| 1998 | 8                                                                      | 189                                             | 4                                                                  | 24                                                                     | 4340                                            | 45                                                                 | 29                                                                     | 9556                                            | 107                                                                |
| 1999 | 8                                                                      | 173                                             | 2                                                                  | 26                                                                     | 4618                                            | 55                                                                 | 31                                                                     | 10513                                           | 96                                                                 |
| 2000 | 10                                                                     | 251                                             | 3                                                                  | 29                                                                     | 4032                                            | 68                                                                 | 38                                                                     | 11337                                           | 99                                                                 |
| 2001 | 15                                                                     | 344                                             | 5                                                                  | 30                                                                     | 5165                                            | 55                                                                 | 43                                                                     | 13094                                           | 108                                                                |
| 2002 | 19                                                                     | 405                                             | 2                                                                  | 31                                                                     | 5385                                            | 46                                                                 | 47                                                                     | 14416                                           | 108                                                                |
| 2003 | 21                                                                     | 361                                             | 7                                                                  | 32                                                                     | 5681                                            | 48                                                                 | 49                                                                     | 16517                                           | 120                                                                |
| 2004 | 23                                                                     | 503                                             | 16                                                                 | 33                                                                     | 4845                                            | 63                                                                 | 52                                                                     | 18523                                           | 125                                                                |
| 2005 | 31                                                                     | 934                                             | 13                                                                 | 35                                                                     | 5299                                            | 48                                                                 | 62                                                                     | 20193                                           | 115                                                                |
| 2006 | 39                                                                     | 1270                                            | 14                                                                 | 36                                                                     | 5873                                            | 33                                                                 | 69                                                                     | 21706                                           | 122                                                                |
| 2007 | 39                                                                     | 1355                                            | 13                                                                 | 37                                                                     | 5406                                            | 32                                                                 | 71                                                                     | 22065                                           | 110                                                                |
| 2008 | 50                                                                     | 1788                                            | 19                                                                 | 38                                                                     | 5755                                            | 39                                                                 | 83                                                                     | 22706                                           | 127                                                                |
| 2009 | 57                                                                     | 2273                                            | 24                                                                 | 42                                                                     | 5023                                            | 24                                                                 | 94                                                                     | 24987                                           | 152                                                                |
| 2010 | 64                                                                     | 3073                                            | 29                                                                 | 44                                                                     | 5933                                            | 20                                                                 | 103                                                                    | 27796                                           | 112                                                                |
| 2011 | 71                                                                     | 3332                                            | 33                                                                 | 47                                                                     | 5729                                            | 22                                                                 | 110                                                                    | 33679                                           | 148                                                                |
| 2012 | 77                                                                     | 3477                                            | 19                                                                 | 48                                                                     | 6074                                            | 36                                                                 | 118                                                                    | 35416                                           | 153                                                                |
| 2013 | 78                                                                     | 3929                                            | 22                                                                 | 48                                                                     | 6720                                            | 38                                                                 | 119                                                                    | 35282                                           | 137                                                                |
| 2014 | 78                                                                     | 4391                                            | 35                                                                 | 48                                                                     | 6636                                            | 24                                                                 | 119                                                                    | 34812                                           | 136                                                                |
| 2015 | 78                                                                     | 4546                                            | 33                                                                 | 48                                                                     | 6162                                            | 26                                                                 | 119                                                                    | 33280                                           | 135                                                                |
| 2016 | 78                                                                     | 4083                                            | 25                                                                 | 48                                                                     | 6451                                            | 27                                                                 | 119                                                                    | 34770                                           | 130                                                                |
| 2017 | 78                                                                     | 4098                                            | 19                                                                 | 48                                                                     | 6620                                            | 18                                                                 | 119                                                                    | 33035                                           | 94                                                                 |
| 2018 | 78                                                                     | 4708                                            | 34                                                                 | 48                                                                     | 6372                                            | 11                                                                 | 119                                                                    | 32948                                           | 118                                                                |



Supplementary table 3 Cell lines: misidentified as obtained through reanalysis of the dataset of Babic, Capes-Davis, Martone, Bairoch, Ozyurt, Gillespie and Bandrowski <sup>3</sup>

|             | <b>BMC</b>                                    |                                                             | <b>Nature Portfolio</b>                       |                                                             | <b>Journals without guidelines</b>            |                                                             |
|-------------|-----------------------------------------------|-------------------------------------------------------------|-----------------------------------------------|-------------------------------------------------------------|-----------------------------------------------|-------------------------------------------------------------|
|             | Total number of articles that use a cell line | Total number of articles that use a misidentified cell line | Total number of articles that use a cell line | Total number of articles that use a misidentified cell line | Total number of articles that use a cell line | Total number of articles that use a misidentified cell line |
| <b>2000</b> | 2                                             | 0                                                           | 0                                             | 0                                                           | 0                                             | 0                                                           |
| <b>2001</b> | 21                                            | 1                                                           | 0                                             | 0                                                           | 0                                             | 0                                                           |
| <b>2002</b> | 53                                            | 2                                                           | 139                                           | 6                                                           | 0                                             | 0                                                           |
| <b>2003</b> | 57                                            | 2                                                           | 168                                           | 7                                                           | 0                                             | 0                                                           |
| <b>2004</b> | 98                                            | 4                                                           | 156                                           | 14                                                          | 3                                             | 0                                                           |
| <b>2005</b> | 233                                           | 9                                                           | 116                                           | 4                                                           | 246                                           | 7                                                           |
| <b>2006</b> | 296                                           | 6                                                           | 94                                            | 4                                                           | 248                                           | 5                                                           |
| <b>2007</b> | 420                                           | 16                                                          | 126                                           | 8                                                           | 363                                           | 10                                                          |
| <b>2008</b> | 480                                           | 19                                                          | 136                                           | 5                                                           | 461                                           | 9                                                           |
| <b>2009</b> | 610                                           | 19                                                          | 275                                           | 9                                                           | 603                                           | 15                                                          |
| <b>2010</b> | 733                                           | 27                                                          | 280                                           | 12                                                          | 899                                           | 14                                                          |
| <b>2011</b> | 748                                           | 28                                                          | 289                                           | 9                                                           | 1069                                          | 30                                                          |
| <b>2012</b> | 676                                           | 16                                                          | 314                                           | 14                                                          | 1365                                          | 16                                                          |
| <b>2013</b> | 731                                           | 17                                                          | 386                                           | 10                                                          | 1468                                          | 34                                                          |
| <b>2014</b> | 833                                           | 21                                                          | 400                                           | 12                                                          | 1530                                          | 37                                                          |
| <b>2015</b> | 801                                           | 15                                                          | 461                                           | 12                                                          | 1685                                          | 43                                                          |
| <b>2016</b> | 675                                           | 10                                                          | 504                                           | 12                                                          | 1832                                          | 46                                                          |
| <b>2017</b> | 572                                           | 13                                                          | 453                                           | 13                                                          | 2209                                          | 57                                                          |
| <b>2018</b> | 30                                            | 0                                                           | 9                                             | 0                                                           | 61                                            | 2                                                           |

Supplementary table 4 Cell lines: misidentified cell lines in *International Journal of cancer* and *Blood*

| International Journal of Cancer |                                 |                                |                                                   |                                          |                                         |                                                            |                            |
|---------------------------------|---------------------------------|--------------------------------|---------------------------------------------------|------------------------------------------|-----------------------------------------|------------------------------------------------------------|----------------------------|
|                                 | Unaware - before first reported | Unaware - after first reported | Unaware - unclear before or after first reported* | Same tissue type - before first reported | Same tissue type - after first reported | Same tissue type - unclear before or after first reported* | Aware of misidentification |
| 1995                            | 1                               | 6                              | 1                                                 | 1                                        | 1                                       | 0                                                          | 0                          |
| 1996                            | 3                               | 5                              | 3                                                 | 0                                        | 1                                       | 0                                                          | 0                          |
| 1997                            | 7                               | 1                              | 1                                                 | 1                                        | 3                                       | 0                                                          | 0                          |
| 1998                            | 3                               | 4                              | 1                                                 | 0                                        | 3                                       | 0                                                          | 2                          |
| 1999                            | 7                               | 3                              | 0                                                 | 0                                        | 1                                       | 0                                                          | 0                          |
| 2000                            | 3                               | 1                              | 0                                                 | 1                                        | 2                                       | 0                                                          | 0                          |
| 2001                            | 3                               | 6                              | 2                                                 | 1                                        | 1                                       | 0                                                          | 0                          |
| 2002                            | 3                               | 2                              | 0                                                 | 1                                        | 1                                       | 0                                                          | 1                          |
| 2003                            | 3                               | 3                              | 0                                                 | 1                                        | 2                                       | 1                                                          | 1                          |
| 2004                            | 3                               | 6                              | 0                                                 | 1                                        | 1                                       | 0                                                          | 0                          |
| 2005                            | 3                               | 4                              | 1                                                 | 0                                        | 3                                       | 0                                                          | 0                          |
| 2006                            | 2                               | 4                              | 0                                                 | 0                                        | 1                                       | 1                                                          | 2                          |
| 2007                            | 2                               | 2                              | 1                                                 | 0                                        | 1                                       | 0                                                          | 0                          |
| 2008                            | 1                               | 1                              | 2                                                 | 0                                        | 0                                       | 1                                                          | 2                          |
| 2009                            | 1                               | 4                              | 0                                                 | 0                                        | 1                                       | 0                                                          | 1                          |
| 2010                            | 1                               | 0                              | 0                                                 | 1                                        | 2                                       | 0                                                          | 0                          |
| 2011                            | 1                               | 1                              | 0                                                 | 0                                        | 0                                       | 0                                                          | 0                          |
| 2012                            | 0                               | 0                              | 0                                                 | 0                                        | 0                                       | 0                                                          | 2                          |
| 2013                            | 0                               | 1                              | 0                                                 | 0                                        | 0                                       | 0                                                          | 0                          |
| 2014                            | 0                               | 0                              | 0                                                 | 0                                        | 0                                       | 0                                                          | 0                          |
| 2015                            | 1                               | 0                              | 0                                                 | 1                                        | 0                                       | 1                                                          | 0                          |
| 2016                            | 0                               | 0                              | 0                                                 | 0                                        | 0                                       | 0                                                          | 0                          |
| 2017                            | 0                               | 0                              | 0                                                 | 0                                        | 0                                       | 0                                                          | 0                          |
| 2018                            | 0                               | 0                              | 0                                                 | 0                                        | 0                                       | 0                                                          | 0                          |

| Blood |                                 |                                |                                                   |                                          |                                         |                                                            |                            |
|-------|---------------------------------|--------------------------------|---------------------------------------------------|------------------------------------------|-----------------------------------------|------------------------------------------------------------|----------------------------|
|       | Unaware - before first reported | Unaware - after first reported | Unaware - unclear before or after first reported* | Same tissue type - before first reported | Same tissue type - after first reported | Same tissue type - unclear before or after first reported* | Aware of misidentification |
| 1995  | 10                              | 1                              | 0                                                 | 2                                        | 0                                       | 0                                                          | 0                          |
| 1996  | 13                              | 0                              | 0                                                 | 0                                        | 0                                       | 1                                                          | 0                          |
| 1997  | 12                              | 1                              | 1                                                 | 1                                        | 0                                       | 0                                                          | 0                          |
| 1998  | 1                               | 3                              | 0                                                 | 1                                        | 0                                       | 0                                                          | 0                          |
| 1999  | 6                               | 6                              | 1                                                 | 1                                        | 0                                       | 0                                                          | 1                          |
| 2000  | 3                               | 1                              | 0                                                 | 0                                        | 0                                       | 0                                                          | 0                          |
| 2001  | 3                               | 4                              | 0                                                 | 1                                        | 0                                       | 0                                                          | 0                          |
| 2002  | 2                               | 3                              | 0                                                 | 0                                        | 0                                       | 0                                                          | 0                          |
| 2003  | 3                               | 3                              | 0                                                 | 3                                        | 0                                       | 0                                                          | 0                          |
| 2004  | 0                               | 0                              | 1                                                 | 0                                        | 0                                       | 0                                                          | 0                          |
| 2005  | 1                               | 3                              | 0                                                 | 0                                        | 0                                       | 0                                                          | 0                          |
| 2006  | 0                               | 1                              | 0                                                 | 0                                        | 2                                       | 0                                                          | 0                          |
| 2007  | 1                               | 2                              | 0                                                 | 0                                        | 0                                       | 0                                                          | 0                          |
| 2008  | 0                               | 1                              | 0                                                 | 0                                        | 0                                       | 0                                                          | 1                          |
| 2009  | 0                               | 2                              | 0                                                 | 0                                        | 0                                       | 0                                                          | 0                          |
| 2010  | 0                               | 0                              | 0                                                 | 0                                        | 0                                       | 0                                                          | 0                          |
| 2011  | 0                               | 0                              | 0                                                 | 0                                        | 0                                       | 0                                                          | 0                          |
| 2012  | 0                               | 3                              | 0                                                 | 0                                        | 0                                       | 0                                                          | 0                          |
| 2013  | 0                               | 0                              | 0                                                 | 0                                        | 0                                       | 0                                                          | 0                          |
| 2014  | 0                               | 0                              | 0                                                 | 0                                        | 0                                       | 0                                                          | 0                          |
| 2015  | 0                               | 0                              | 0                                                 | 0                                        | 0                                       | 0                                                          | 0                          |
| 2016  | 0                               | 1                              | 0                                                 | 0                                        | 0                                       | 0                                                          | 0                          |
| 2017  | 0                               | 0                              | 0                                                 | 0                                        | 0                                       | 0                                                          | 0                          |
| 2018  | 0                               | 0                              | 0                                                 | 0                                        | 0                                       | 0                                                          | 0                          |

\*In figure 3 the articles for which it was unclear whether they used the cell line before or after it had been first reported were counted as before.

Supplementary table 5 Antibodies: identifiability as obtained through reanalysis of the dataset of Menke, Roelandse, Ozyurt, Martone and Bandrowski <sup>5</sup>

|      | BMC                               |                                   |                                  |                                 | Nature                            |                                   |                                  |                                 | Other Journals with guidelines    |                                   |                                  |                                 | Journals without guidelines       |                                   |                                  |                                 |
|------|-----------------------------------|-----------------------------------|----------------------------------|---------------------------------|-----------------------------------|-----------------------------------|----------------------------------|---------------------------------|-----------------------------------|-----------------------------------|----------------------------------|---------------------------------|-----------------------------------|-----------------------------------|----------------------------------|---------------------------------|
|      | total number of journals analyzed | total number of articles analyzed | total number of antibodies found | average % identifiable per year | total number of journals analyzed | total number of articles analyzed | total number of antibodies found | average % identifiable per year | total number of journals analyzed | total number of articles analyzed | total number of antibodies found | average % identifiable per year | total number of journals analyzed | total number of articles analyzed | total number of antibodies found | average % identifiable per year |
| 1996 | 0                                 | 0                                 | 0                                | 0                               | 0                                 | 0                                 | 0                                | 0                               | 1                                 | 26                                | 26                               | 7.69%                           | 0                                 | 0                                 | 0                                | 0                               |
| 1997 | 0                                 | 0                                 | 0                                | 0                               | 0                                 | 0                                 | 0                                | 0                               | 2                                 | 699                               | 699                              | 11.75%                          | 0                                 | 0                                 | 0                                | 0                               |
| 1998 | 0                                 | 0                                 | 0                                | 0                               | 0                                 | 0                                 | 0                                | 0                               | 2                                 | 790                               | 790                              | 11.10%                          | 0                                 | 0                                 | 0                                | 0                               |
| 1999 | 0                                 | 0                                 | 0                                | 0                               | 0                                 | 0                                 | 0                                | 0                               | 2                                 | 619                               | 619                              | 15.20%                          | 0                                 | 0                                 | 0                                | 0                               |
| 2000 | 0                                 | 0                                 | 0                                | 0                               | 0                                 | 0                                 | 0                                | 0                               | 2                                 | 649                               | 649                              | 12.58%                          | 0                                 | 0                                 | 0                                | 0                               |
| 2001 | 2                                 | 27                                | 27                               | 18.33%                          | 0                                 | 0                                 | 0                                | 0                               | 2                                 | 572                               | 572                              | 12.48%                          | 0                                 | 0                                 | 0                                | 0                               |
| 2002 | 4                                 | 56                                | 56                               | 5.74%                           | 0                                 | 0                                 | 0                                | 0                               | 2                                 | 539                               | 539                              | 14.14%                          | 2                                 | 229                               | 229                              | 9.56%                           |
| 2003 | 5                                 | 106                               | 106                              | 16.01%                          | 0                                 | 0                                 | 0                                | 0                               | 4                                 | 613                               | 613                              | 15.43%                          | 2                                 | 263                               | 263                              | 8.06%                           |
| 2004 | 9                                 | 195                               | 195                              | 19.96%                          | 0                                 | 0                                 | 0                                | 0                               | 3                                 | 576                               | 576                              | 18.39%                          | 3                                 | 295                               | 295                              | 8.63%                           |
| 2005 | 16                                | 515                               | 515                              | 11.90%                          | 0                                 | 0                                 | 0                                | 0                               | 4                                 | 603                               | 603                              | 15.09%                          | 9                                 | 533                               | 533                              | 8.35%                           |
| 2006 | 27                                | 783                               | 783                              | 12.79%                          | 0                                 | 0                                 | 0                                | 0                               | 7                                 | 678                               | 678                              | 14.94%                          | 12                                | 611                               | 611                              | 13.42%                          |
| 2007 | 25                                | 883                               | 889                              | 15.08%                          | 0                                 | 0                                 | 0                                | 0                               | 11                                | 1156                              | 1157                             | 14.66%                          | 14                                | 839                               | 841                              | 12.69%                          |
| 2008 | 32                                | 1215                              | 1218                             | 15.69%                          | 2                                 | 31                                | 31                               | 13.25%                          | 14                                | 1922                              | 1934                             | 14.62%                          | 21                                | 1182                              | 1183                             | 11.89%                          |
| 2009 | 42                                | 1724                              | 1727                             | 15.14%                          | 12                                | 360                               | 360                              | 15.34%                          | 15                                | 2703                              | 2717                             | 19.03%                          | 32                                | 1770                              | 1773                             | 13.09%                          |
| 2010 | 55                                | 2523                              | 2539                             | 16.91%                          | 14                                | 419                               | 419                              | 17.83%                          | 20                                | 3954                              | 3970                             | 18.04%                          | 46                                | 2283                              | 2284                             | 15.95%                          |
| 2011 | 59                                | 2520                              | 2534                             | 17.07%                          | 19                                | 620                               | 625                              | 17.59%                          | 30                                | 6551                              | 6581                             | 18.01%                          | 61                                | 2900                              | 2906                             | 14.80%                          |
| 2012 | 60                                | 2610                              | 2637                             | 16.98%                          | 21                                | 867                               | 869                              | 20.76%                          | 48                                | 10188                             | 10309                            | 20.87%                          | 106                               | 4540                              | 4550                             | 16.91%                          |
| 2013 | 73                                | 3040                              | 3074                             | 19.40%                          | 23                                | 1414                              | 1415                             | 23.25%                          | 63                                | 13209                             | 13289                            | 22.99%                          | 118                               | 6086                              | 6105                             | 17.18%                          |
| 2014 | 77                                | 3668                              | 3694                             | 19.59%                          | 23                                | 1934                              | 1944                             | 28.91%                          | 70                                | 12957                             | 13192                            | 23.75%                          | 168                               | 8276                              | 8351                             | 19.29%                          |
| 2015 | 82                                | 3755                              | 3808                             | 22.24%                          | 23                                | 4233                              | 4248                             | 30.96%                          | 76                                | 13575                             | 13913                            | 26.33%                          | 179                               | 8785                              | 8830                             | 19.08%                          |
| 2016 | 71                                | 3182                              | 3305                             | 22.14%                          | 26                                | 7607                              | 7644                             | 32.40%                          | 81                                | 14640                             | 16178                            | 31.03%                          | 199                               | 10167                             | 10191                            | 19.75%                          |
| 2017 | 76                                | 3288                              | 3436                             | 23.07%                          | 29                                | 9270                              | 9470                             | 32.02%                          | 93                                | 17168                             | 22341                            | 37.21%                          | 226                               | 12016                             | 12134                            | 21.16%                          |
| 2018 | 80                                | 3792                              | 4073                             | 24.87%                          | 29                                | 6943                              | 7265                             | 33.98%                          | 103                               | 14503                             | 22860                            | 42.67%                          | 250                               | 15253                             | 15575                            | 22.72%                          |
| 019  | 64                                | 2853                              | 3074                             | 29.64%                          | 17                                | 4325                              | 4654                             | 37.43%                          | 84                                | 8104                              | 14697                            | 44.04%                          | 187                               | 11376                             | 11713                            | 25.61%                          |

Supplementary table 6 Organisms: identifiability as obtained through reanalysis of the dataset of Menke, Roelandse, Ozyurt, Martone and Bandrowski <sup>5</sup>

|      | BMC                               |                                   |                                 |                                 | Nature                            |                                   |                                 |                                 | Other Journals with guidelines    |                                   |                                 |                                 | Journals without guidelines       |                                   |                                 |                                 |
|------|-----------------------------------|-----------------------------------|---------------------------------|---------------------------------|-----------------------------------|-----------------------------------|---------------------------------|---------------------------------|-----------------------------------|-----------------------------------|---------------------------------|---------------------------------|-----------------------------------|-----------------------------------|---------------------------------|---------------------------------|
|      | total number of journals analyzed | total number of articles analyzed | total number of organisms found | average % identifiable per year | total number of journals analyzed | total number of articles analyzed | total number of organisms found | average % identifiable per year | total number of journals analyzed | total number of articles analyzed | total number of organisms found | average % identifiable per year | total number of journals analyzed | total number of articles analyzed | total number of organisms found | average % identifiable per year |
| 1996 | 0                                 | 0                                 | 0                               | 0                               | 0                                 | 0                                 | 0                               | 0                               | 1                                 | 39                                | 36                              | 31%                             | 0                                 | 0                                 | 0                               | 0                               |
| 1997 | 0                                 | 0                                 | 0                               | 0                               | 0                                 | 0                                 | 0                               | 0                               | 2                                 | 911                               | 632                             | 21%                             | 0                                 | 0                                 | 0                               | 0                               |
| 1998 | 0                                 | 0                                 | 0                               | 0                               | 0                                 | 0                                 | 0                               | 0                               | 2                                 | 987                               | 885                             | 21%                             | 0                                 | 0                                 | 0                               | 0                               |
| 1999 | 0                                 | 0                                 | 0                               | 0                               | 0                                 | 0                                 | 0                               | 0                               | 2                                 | 815                               | 713                             | 20%                             | 0                                 | 0                                 | 0                               | 0                               |
| 2000 | 0                                 | 0                                 | 0                               | 0                               | 0                                 | 0                                 | 0                               | 0                               | 2                                 | 848                               | 801                             | 17%                             | 0                                 | 0                                 | 0                               | 0                               |
| 2001 | 5                                 | 107                               | 84                              | 31%                             | 0                                 | 0                                 | 0                               | 0                               | 2                                 | 731                               | 804                             | 12%                             | 0                                 | 0                                 | 0                               | 0                               |
| 2002 | 6                                 | 137                               | 72                              | 20%                             | 1                                 | 499                               | 63                              | 32%                             | 2                                 | 686                               | 776                             | 15%                             | 0                                 | 0                                 | 0                               | 0                               |
| 2003 | 8                                 | 356                               | 144                             | 17%                             | 1                                 | 608                               | 53                              | 30%                             | 3                                 | 764                               | 1123                            | 11%                             | 1                                 | 113                               | 17                              | 0%                              |
| 2004 | 14                                | 586                               | 238                             | 25%                             | 1                                 | 610                               | 40                              | 20%                             | 3                                 | 819                               | 996                             | 15%                             | 2                                 | 198                               | 32                              | 31%                             |
| 2005 | 14                                | 1260                              | 390                             | 27%                             | 1                                 | 489                               | 40                              | 35%                             | 7                                 | 1008                              | 1219                            | 19%                             | 4                                 | 1154                              | 148                             | 21%                             |
| 2006 | 20                                | 2144                              | 604                             | 21%                             | 1                                 | 483                               | 21                              | 24%                             | 13                                | 1548                              | 1485                            | 18%                             | 6                                 | 1074                              | 210                             | 24%                             |
| 2007 | 33                                | 3059                              | 1202                            | 20%                             | 1                                 | 472                               | 38                              | 37%                             | 15                                | 2601                              | 2208                            | 21%                             | 12                                | 1676                              | 405                             | 23%                             |
| 2008 | 37                                | 4033                              | 1393                            | 26%                             | 5                                 | 624                               | 148                             | 21%                             | 22                                | 4598                              | 3488                            | 21%                             | 17                                | 2225                              | 780                             | 25%                             |
| 2009 | 44                                | 5118                              | 1533                            | 22%                             | 17                                | 1250                              | 860                             | 15%                             | 25                                | 6745                              | 5026                            | 15%                             | 25                                | 2805                              | 1095                            | 20%                             |
| 2010 | 54                                | 7440                              | 2346                            | 21%                             | 20                                | 1370                              | 1003                            | 18%                             | 47                                | 10312                             | 6844                            | 21%                             | 39                                | 4060                              | 1997                            | 19%                             |
| 2011 | 65                                | 8305                              | 2446                            | 21%                             | 22                                | 1765                              | 1291                            | 18%                             | 59                                | 18072                             | 10412                           | 22%                             | 61                                | 5534                              | 2493                            | 19%                             |
| 2012 | 63                                | 9472                              | 2620                            | 22%                             | 28                                | 2577                              | 1896                            | 18%                             | 98                                | 31822                             | 16064                           | 20%                             | 84                                | 7978                              | 3816                            | 21%                             |
| 2013 | 77                                | 12135                             | 2853                            | 20%                             | 29                                | 4409                              | 3096                            | 21%                             | 110                               | 43802                             | 20380                           | 22%                             | 97                                | 9919                              | 4135                            | 20%                             |
| 2014 | 78                                | 14873                             | 3505                            | 21%                             | 31                                | 5900                              | 4310                            | 19%                             | 141                               | 49435                             | 21294                           | 21%                             | 138                               | 15059                             | 5803                            | 22%                             |
| 2015 | 81                                | 14648                             | 3863                            | 19%                             | 33                                | 11675                             | 8013                            | 18%                             | 154                               | 50552                             | 21635                           | 21%                             | 149                               | 18116                             | 7420                            | 20%                             |
| 2016 | 78                                | 12190                             | 3718                            | 20%                             | 37                                | 20729                             | 12606                           | 17%                             | 159                               | 49992                             | 20879                           | 23%                             | 163                               | 25180                             | 10202                           | 19%                             |
| 2017 | 86                                | 15162                             | 3982                            | 21%                             | 40                                | 26142                             | 15800                           | 18%                             | 175                               | 56493                             | 24796                           | 21%                             | 175                               | 32502                             | 11452                           | 21%                             |
| 2018 | 88                                | 16410                             | 4234                            | 21%                             | 39                                | 21879                             | 13514                           | 22%                             | 202                               | 68604                             | 29794                           | 23%                             | 181                               | 30452                             | 10762                           | 21%                             |
| 2019 | 68                                | 10186                             | 2971                            | 23%                             | 25                                | 14246                             | 7995                            | 18%                             | 163                               | 48090                             | 20665                           | 24%                             | 129                               | 18900                             | 6148                            | 22%                             |

## Supplementary references

1. Horbach SPJM, Halfman W. The ghosts of HeLa: How cell line misidentification contaminates the scientific literature. *PloS one* 2017;12:e0186281.
2. Perianes-Rodriguez A, Waltman L, Van Eck NJ. Constructing bibliometric networks: A comparison between full and fractional counting. *Journal of Informetrics* 2016;10:1178-95.
3. Fusenig NE, Capes-Davis A, Bianchini F, Sundell S, Lichter P. The need for a worldwide consensus for cell line authentication: experience implementing a mandatory requirement at the International Journal of Cancer. *PLoS biology* 2017;15:e2001438.
4. Babic Z, Capes-Davis A, Martone ME, Bairoch A, Ozyurt IB, Gillespie TH, Bandrowski AE. Meta-Research: Incidences of problematic cell lines are lower in papers that use RRIDs to identify cell lines. *Elife* 2019;8:e41676.
5. Menke J, Roelandse M, Ozyurt B, Martone M, Bandrowski A. The Rigor and Transparency Index Quality Metric for Assessing Biological and Medical Science Methods. *Iscience* 2020;23:101698.
